1 **Network remodeling induced by transcranial brain**  
2 **stimulation: A computational model of**  
3 **tDCS-triggered cell assembly formation**

4 **Abbreviated title:** tDCS-triggered cell assembly formation

5 Han Lu<sup>1,2</sup>, Júlia V. Gallinaro<sup>1</sup> and Stefan Rotter<sup>1</sup>

6 <sup>1</sup> Bernstein Center Freiburg & Faculty of Biology, University of Freiburg, Freiburg, Ger-  
7 many

8 <sup>2</sup> Institute of Cellular and Integrative Neuroscience, University of Strasbourg, Strasbourg,  
9 France

10 **Corresponding author:**

11 Stefan Rotter

12 Bernstein Center Freiburg

13 Hansasträße 9a

14 79104 Freiburg

15 Germany

16 stefan.rotter@bio.uni-freiburg.de

17  
18 **Conflict of interests:** The authors declare no competing financial interests.

19 **Code Accessibility:** Simulation and analysis code is available upon request.

20

## Abstract

21

22

23

24

25

26

27

28

29

30

31

32

33

34

35

36

37

38

Transcranial direct current stimulation (tDCS) is a variant of non-invasive neuromodulation, which promises treatment for diseases like major depressive disorder or chronic pain for patients resistant to conventional therapies. In experiments, long lasting after-effects were observed, suggesting that plastic changes were induced. The exact mechanism underlying the emergence and maintenance of these after-effects, however, remains elusive. Here we propose a model to explain how transcranial stimulation triggers a homeostatic response of the network involving growth and decay of synapses. In our model, the cortical tissue underneath the electrodes is conceived as a recurrent network of excitatory and inhibitory neurons, in which excitatory-to-excitatory synapses are subject to structural plasticity. Various aspects of stimulation were tested via numerical simulations of such networks, including size and montage of the electrode, as well as intensity and duration of the stimulation. Our results suggest that stimulation indeed perturbs the homeostatic equilibrium and leads to cell assembly formation. Strong focal stimulation, for example, enhances the connectivity of new cell assemblies by increasing the rate of synaptic remodeling. Repetitive stimulation with well-chosen duty cycles increases the impact of stimulation as well. The long-term goal of our work is to optimize the impact of tDCS in clinical applications.

39

## Introduction

40

41

42

43

44

45

46

47

48

49

50

51

52

53

54

55

56

57

58

59

60

61

62

63

64

Transcranial direct current stimulation (tDCS) is a non-invasive brain stimulation technique, where a weak constant current (typically a few mA) is applied to the brain via two or more electrodes attached to the scalp (DaSilva et al., 2011; Edwards et al., 2013). In any tDCS montage, electrical charge is delivered to the brain through an anode and a cathode, which establishes an electric field with a specific geometry (Miranda et al., 2006). Weak electric current passing through the neural tissue and the induced weak electric field are typically not sufficient to trigger action potentials directly, but they are able to either depolarize or hyperpolarize the membrane of single neurons to some degree (Joucla and Yvert, 2009). The membrane potential change, however, can influence spike timing and firing rate of neurons which are part of an active network (Bikson et al., 2006). As a consequence, and similar to other methods of neuromodulation, tDCS is claimed to have a certain potential for treating diseases, such as medication-resistant depressive disorder (Nitsche et al., 2009) or chronic pain (Garcia-Larrea, 2016). It has been shown to have antidepressant effects by targeting the imbalanced activity between the dorsolateral prefrontal cortex of both hemispheres (Loo et al., 2012), and to ameliorate neuropathic pain by targeting primary motor cortex (Ngernyam et al., 2015).

Although there is a record of promising applications of tDCS, it is not yet clear what its underlying neuronal mechanisms are. Immediate changes of neural activity caused by tDCS have been demonstrated both in humans and in rodents. Positron-emission tomography (PET) in humans revealed that tDCS affects the activity in many different brain regions, but the volume directly underneath the stimulation electrodes is influenced most (Lang et al., 2005). Modeling studies have mapped the relation between the amplitude of the applied current, or the induced electric field strength, respectively, and the changes in the membrane potential of neurons (Huang et al., 2017; Datta et al., 2009; Jackson et al., 2016). Experiments in acute hippocampal slices elucidated the relation between the

65 orientation of the electric field (EF) and the resulting neural activity (Bikson et al., 2004).  
66 In contrast to the naive expectation that anodal stimulation increases the activity of the  
67 stimulated area, while cathodal stimulation inhibits it, the actual effects appear to depend  
68 mainly on the orientation of the EF vector relative to the somato-dendritic axis of neu-  
69 rons (Wiethoff et al., 2014; Gluckman et al., 1996; Radman et al., 2009). When the EF is  
70 properly aligned with the somato-dendritic axis (dendrite closer to anode than soma), the  
71 somatic membrane potential is depolarized and the neuronal firing rate is increased. For  
72 the opposite EF direction, the somatic membrane potential is hyperpolarized and neural  
73 activity is attenuated. If the EF is perpendicular to the somato-dendritic orientation, the  
74 EF cannot influence the activity of this particular neuron. As a consequence, cells with  
75 extended and non-isotropic morphologies such as pyramidal neurons, should generally be  
76 more influenced by tDCS than compact inhibitory neurons. In an effective point neuron  
77 model, the polarization induced by an external EF can be equivalently described by a  
78 current injected into the soma. This rationale was suggested by the following experimen-  
79 tal observation: A uniform EF was able to inhibit KCl-induced epileptiform activity in  
80 rat hippocampal slices (Gluckman et al., 1996), but an equivalent effect could be achieved  
81 by somatic DC injection (Kayyali and Durand, 1991). An equivalent effect of current in-  
82 jection and EF exposure was also demonstrated in a simulation study (Aspart et al., 2016).

83  
84 In addition to the instant activity change during stimulation, sustained alterations  
85 of neural activity were also observed in humans after turning the stimulation off. The  
86 after-effects of tDCS were first reported by Nitsche and Paulus (2000); they used transcran-  
87 ial magnetic stimulation (TMS) triggering motor evoked potentials (MEP) in the right  
88 abductor digiti minimi muscle (ADM) as a readout of the after-effects of tDCS in motor  
89 cortex. An elevated MEP was reported even 150 min after tDCS application (1 mA) in  
90 motor cortex (Nitsche and Paulus, 2001). Such after-effects were later also observed in  
91 somatosensory cortex (Matsunaga et al., 2004). Follow-up animal studies suggested that  
92 the elevated activity and excitability is not due to reverberating network effects (Gartside,  
93 1968a). Rather, it was observed that synaptic protein synthesis was increased (Gartside,  
94 1968b), which already points to elevated synaptic plasticity. Indeed, blocking brain de-  
95 rived neurotrophic factor (BDNF) (Fritsch et al., 2010), NMDA receptors (Nitsche et al.,  
96 2003) or calcium channels (Monte-Silva et al., 2013) reduced the increments of field po-  
97 tential amplitudes in mouse motor cortex induced by tDCS. All of these findings taken  
98 together suggest very strongly that the observed after-effects are due to an induction of  
99 synaptic plasticity.

100 Current evidence suggests, however, that multiple forms of plasticity are contributing  
101 to tDCS after-effects. Monte-Silva et al. (2013) observed different types of after-effects,  
102 linked to different stimulation patterns: Fast facilitation was induced already after a  
103 single anodal tDCS session (13 min) and lasted for at least 2 h post stimulation. This  
104 phenomenon is called early-LTP (e-LTP). In contrast, 26 min anodal stimulation resulted  
105 in a reduced MEP amplitude, pointing towards a homeostatic down-regulation. More  
106 interestingly, repetitive anodal tDCS with 20 min pauses interspersed (13 min - 20 min  
107 - 13 min) resulted in late facilitation. An elevated MEP was observed only one day  
108 after the second stimulation, but not immediately afterwards. This is called late-LTP  
109 (l-LTP). These results suggest that both Hebbian and homeostatic, as well as functional  
110 and structural forms of plasticity could be involved. Functional LTP-like plastic changes  
111 of existing synapses were observed in DCS (Ranieri et al., 2012). Given the time scales of

112 L-LTP, structural plasticity also seems to play a role in the after-effects. Structural changes  
113 at a slower time scale, however, can easily be underestimated due to difficulties measuring  
114 spine turnover and changes in dendritic morphology *in vivo*. Homeostatic structural  
115 plasticity is constantly taking place in many brain areas (Van Ooyen, 2011; Turrigiano and  
116 Nelson, 2004). For example, in adult barrel cortex and visual cortex, whisker trimming  
117 or monocular deprivation, respectively, trigger robust spine remodeling (Trachtenberg  
118 et al., 2002; Oray et al., 2004). In hippocampal cell cultures, blocking activity with TTX  
119 leads to synapse enlargement and synapse cluster formation (Lee et al., 2013). In view  
120 of all this, it seems very likely that long-lasting after-effects are caused by structural  
121 changes in the network, justifying that we use simulations of spiking neural networks  
122 with homeostatic structural plasticity to study them. In this paper, we systematically  
123 explore the changes in network activity caused by tDCS, and the network remodeling and  
124 cell assembly formation induced by this through a homeostatic response of the network.  
125 Our simulations also predict that a focused and/or repetitive stimulation with well-chosen  
126 duty cycles can boost the effect. This again fits the experiences from tDCS practice with a  
127 high-definition montage (Kuo et al., 2013) and repetitive stimulation (Monte-Silva et al.,  
128 2013).

## 129 Results

### 130 Immediate effect of transcranial stimulation on network activity

131 As explained in the Introduction, the direct current applied to the brain during tDCS  
132 stimulation induces an electric field (EF) (Radman et al., 2009), and may lead to a mem-  
133 brane potential deflection of the soma, depending on the orientation of the EF relative to  
134 the neural somato-dendritic axis (Aspart et al., 2016). An equivalent effect with regard  
135 to membrane potential modulation is achieved by DC injection into the soma (Kayyali  
136 and Durand, 1991). Therefore, in this paper we model tDCS by injecting direct current  
137 into the soma of point neurons (Figure 1A) to achieve a small depolarization or hyper-  
138 polarization of its membrane potential. The current is compatible with the membrane  
139 potential deflection,  $\Delta V$ , and scaled by a geometric factor reflecting the angle between the  
140 EF vector and somato-dendritic axis,  $\theta$  (Figure 1B). The angle  $\theta$  determines the injected  
141 current according to  $\Delta V = \lambda E \cos(\theta)$ , where  $\lambda$  is a scaling factor,  $E$  is the EF intensity.  
142 The equivalent DC to be injected into the neuron is given by Ohm's law  $\Delta I = \frac{\Delta V}{R_m}$ , where  
143  $R_m$  is the membrane resistance. The estimated magnitude of the membrane potential deflection  
144 induced by sub-threshold tDCS (1–2 mA) is about 0.1 mV (Jackson et al., 2016),  
145 corresponding to 2.5 pA DC injected into the soma of each model neuron.

146 We then tested if such weak injected current could at all trigger any firing rate changes.  
147 We set up a single neuron that generated an ongoing spike train at 8 Hz, as if it was  
148 part of a large network. To that end, the ongoing drive from within the network was  
149 approximated by a Poisson bombardment. On top of this, we stimulated the neuron by  
150 DC injection as described above and observed how the orientation of the EF vector with  
151 respect to the orientation of the neuron impacted its firing. Although the overall effect of  
152 tDCS stimulation on the membrane potential of the neuron is quite subtle, the amplitude  
153 of the firing rate change was found to be as large as 1 Hz (Figure 1C).

154 This very clearly suggests that tDCS can have an appreciable impact on the activity of  
155 spiking neurons in a network, even if the stimulation intensity is very weak. As neuronal

156 spiking is known to affect synaptic connectivity due to activity-dependent plasticity, this  
157 raises the question whether direct current stimulation can trigger plastic effects as well.  
158 Thus, our next step was to set up a network of point neurons representing the tissue  
159 underneath an electrode and find out whether stimulation can alter its structure and its  
160 functional dynamics.

## 161 **Network remodeling triggered by transcranial DC stimulation**

162 We adopt an inhibition-dominated recurrent network of excitatory and inhibitory neurons  
163 to represent the cortical tissue underneath the electrodes. The network consists of 10 000  
164 excitatory and 2 500 inhibitory neurons (Brunel, 2000). Neurons are leaky integrate-and-  
165 fire (LIF) neurons, with random but fixed 10% E-I, I-I and I-E connection probability  
166 (Figure 1D). E-E synapses are grown from scratch, subject to a firing rate based home-  
167 ostatic structural plasticity rule (Diaz-Pier et al., 2016; Gallinaro and Rotter, 2018). In  
168 this model we fix the set-point of the neuronal firing rate at 8 Hz and used a linear home-  
169 ostatic rule. Eventually, all excitatory neurons fire at 8 Hz, when the connectivity has  
170 grown to about 9% (Figure 1F).

171 In a previous paper, Gallinaro and Rotter (2018) explored the associative properties  
172 of a similar network subject to firing rate based homeostatic plasticity. They stimulated a  
173 subgroup of excitatory neurons with high-rate external Poisson spike trains. The external  
174 stimulation disrupted the homeostatic equilibrium of the subgroup, as increased firing  
175 rates above the set point led to a deletion of synapses. When the external stimulation  
176 was ceased, the firing rate dropped and homeostatic process robustly triggered synapse  
177 formation within the stimulated group. In the work discussed here, tDCS is modeled as  
178 weak DC injection into the soma, which causes a change in firing rate of all stimulated  
179 neurons. Therefore, we expect similar effects to also happen in the network.

180 We started by stimulating 10% of all excitatory (1 000) neurons in the network with  
181 2.5 pA DC for 150 s (Figure 2A). When the firing rate of the stimulated group had reached  
182 the set-point (same for all neurons), the connectivity also did not change any more with  
183 the stimulation. This suggests that the network reached an equilibrium state (see supple-  
184 mentary Figure S1). At this point, we switched the stimulation off and ran the simulation  
185 for another 300 s. We also tried different stimulation parameters and compared the effects,  
186 as discussed below. As expected, the firing rate of the stimulated group dropped when  
187 the DC was turned off (Figure 2B), and this eventually triggered cell assembly formation  
188 (Figure 2C). The opposite phenomenon was observed in the process of depolarizing DC  
189 (Figure 2D and 2E). Figure 2F illustrates the process of cell assembly formation for the  
190 case of 2.5 pA stimulation. Before and after the stimulation, assuming equilibrium in  
191 both cases, each neuron receives the same rate of external Poisson input and fires at its  
192 target-rate (8 Hz). Thus, the number of input synapses from excitatory neurons should  
193 not have changed through stimulation. The only difference will be the source of input  
194 synapses: Before the stimulation, input synapses come from both groups of neurons –  
195 to be stimulated (blue) and background (empty) – without any bias. The firing rate of  
196 the stimulated neurons is most affected, so when stimulation is off, these neurons have  
197 more free synaptic elements to offer. Background neurons, which are less affected by  
198 stimulation and deviate less from their target rate, can only offer few synaptic elements  
199 to form new connections. Since the formation of new synapses is based on the availability  
200 of free elements, this leads to a higher probability of connections to be formed within

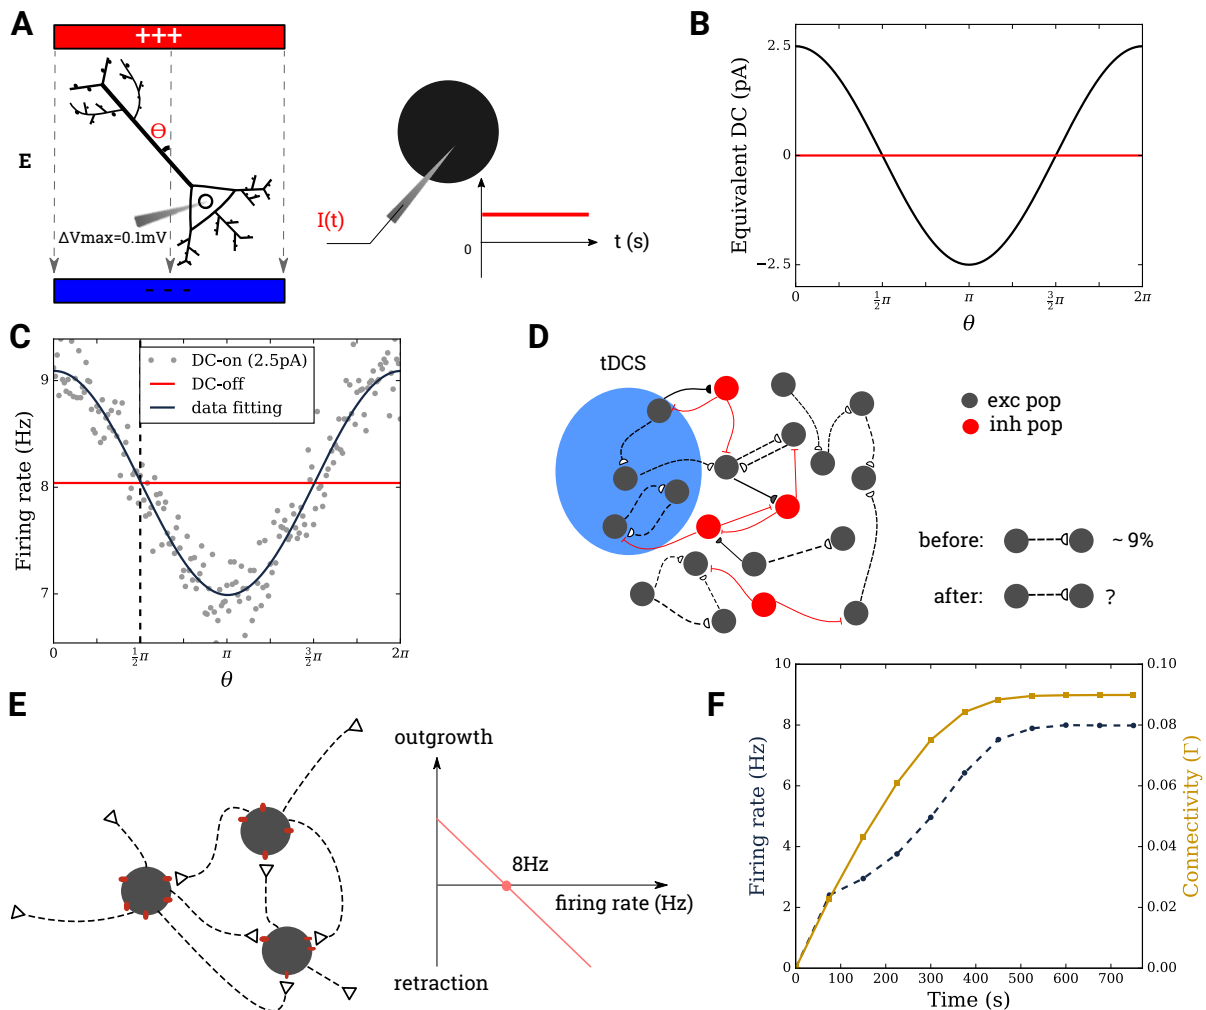

**Figure 1:** Model of a cortical network underneath the stimulation electrode. **A** The effect of tDCS is realized as direct current injection into the soma of point neurons. **B** The current amplitude depends on the orientation of the electric field vector relative to the somato-dendritic axis. **C** Direct current of amplitude 2.5 pA changes the ongoing firing rate of a single neuron by approx. 1 Hz. **D** The cortical tissue underneath the electrode (blue circle) is modeled as a recurrent network of excitatory and inhibitory neurons. E-I, I-I and I-E connections are static with 10% connectivity, while the E-E connections are subject to homeostatic structural plasticity. **E** The growth and decay of pre-synaptic boutons and post-synaptic spines depends linearly on the neuronal firing rate. Synaptic elements grow or retract as long as the firing rate deviates from the set-point, which was fixed at 8 Hz. **F** The network starts with no E-E connections, whatsoever. After 750s, the average firing rate has approximately reached the set-point, and the connectivity  $\Gamma$  has settled in an equilibrium at approx. 9%.

201 the stimulated group. In the case of depolarizing DC the opposite process takes place.  
202 Thus, any perturbation to the equilibrium of the network firing rate dynamics, no matter  
203 whether it is depolarizing or hyperpolarizing, will trigger synaptic turnover and network  
204 remodeling by deleting between-group synapses and forming within-group synapses to  
205 form a cell assembly.

## 206 **The effect of polarity of transcranial DC stimulation**

207 In our model, both depolarizing and hyperpolarizing current stimulation induce cell assem-  
208 bly formation. Due to the different orientations of neurons in real tissue, neurons under-  
209 neath the same electrode may not be uniformly depolarized or hyperpolarized. Therefore,  
210 we examined how a stimulation with mixed polarity performs. In Figure 3 we present  
211 two scenarios: bi-population stimulation, in which 30% of the excitatory neurons (G1)  
212 are depolarized with 2.5 pA whereas the remaining 70% (G2) are hyperpolarized with  
213  $-2.5$  pA (Figure 3A), and tri-population stimulation, in which 30% of all neurons (G1)  
214 are depolarized with 2.5 pA, another group of the same size (G2) are hyperpolarized with  
215  $-2.5$  pA, and the remaining 40% are not stimulated at all. As expected, a combined  
216 depolarizing and hyperpolarizing stimulation resulted in higher connectivity within the  
217 cell assembly formed (Figure 3C, D and Figure 3E, F).

218 To further compare the effects of uni-population, bi-population and tri-population  
219 stimulation, we performed a systematic study covering different intensities and stimulated  
220 group sizes in all three scenarios: bi-group (Figure 4A), uni-group (Figure 4B), and tri-  
221 group (Figure 4C). Throughout, we stimulated the network for 150 s and allowed it to  
222 relax for 5 850 s to see the persistent change in connectivity. For an unbiased assessment  
223 of both short-lived and quasi-permanent effects, We fit the connectivity curve during the  
224 relaxation phase with the sum of three exponential functions and calculated the total  
225 integral from an extrapolation of the measurement of stimulation effects on connectivity.  
226 In the second panel (Figure 4D-F), we show the integral of connectivity over time for  
227 the population G1,  $I_{G_1}$ , in three scenarios. In each scenario, the integral of connectivity  
228 increases with absolute stimulation intensity and decreases with the size of the stimulated  
229 population. Strong and focused stimulation leads to strong effects on the connectivity of  
230 the cell assembly.

231 We then performed a comparison between these scenarios A, B and C. When the  
232 stimulation is strong and focused, the effect  $I_{G_1}$  of scenario B is much stronger than  
233 scenario A (Figure 4G) and C (Figure 4H). But when the stimulation is weak, the effect  
234 of scenario A is larger than scenario B. Therefore, opposite polarities could slightly boost  
235 the cell assembly intensity, if the stimulation is weak. However, for strong and/or focused  
236 stimulation, uni-group stimulation leads to stronger cell assemblies. Comparing A and B  
237 for strong and focused stimulations, the application of same strength negative DC onto  
238 the background in A changes the effect of the same stimulation in B. There might be two  
239 aspects involved in this phenomenon. Introducing a DC stimulation of reversed polarity  
240 increases the discrepancy between intensities of the stimulated group and the background  
241 (from  $\Delta I$  to  $2\Delta I$ ), but may inhibit the firing due to network inhibitory effects. To  
242 disentangle the problem, we fixed the size of the stimulated group G1 as 50% and G2  
243 as 50%, and systematically changed the stimulation intensity for both G1 and G2 in the  
244 range between  $-30$  pA and 30 pA. We stimulated G1 and G2 for 150 s and let it relax for  
245 5 850 s. The effects were estimated again as the integral of connectivity over time during

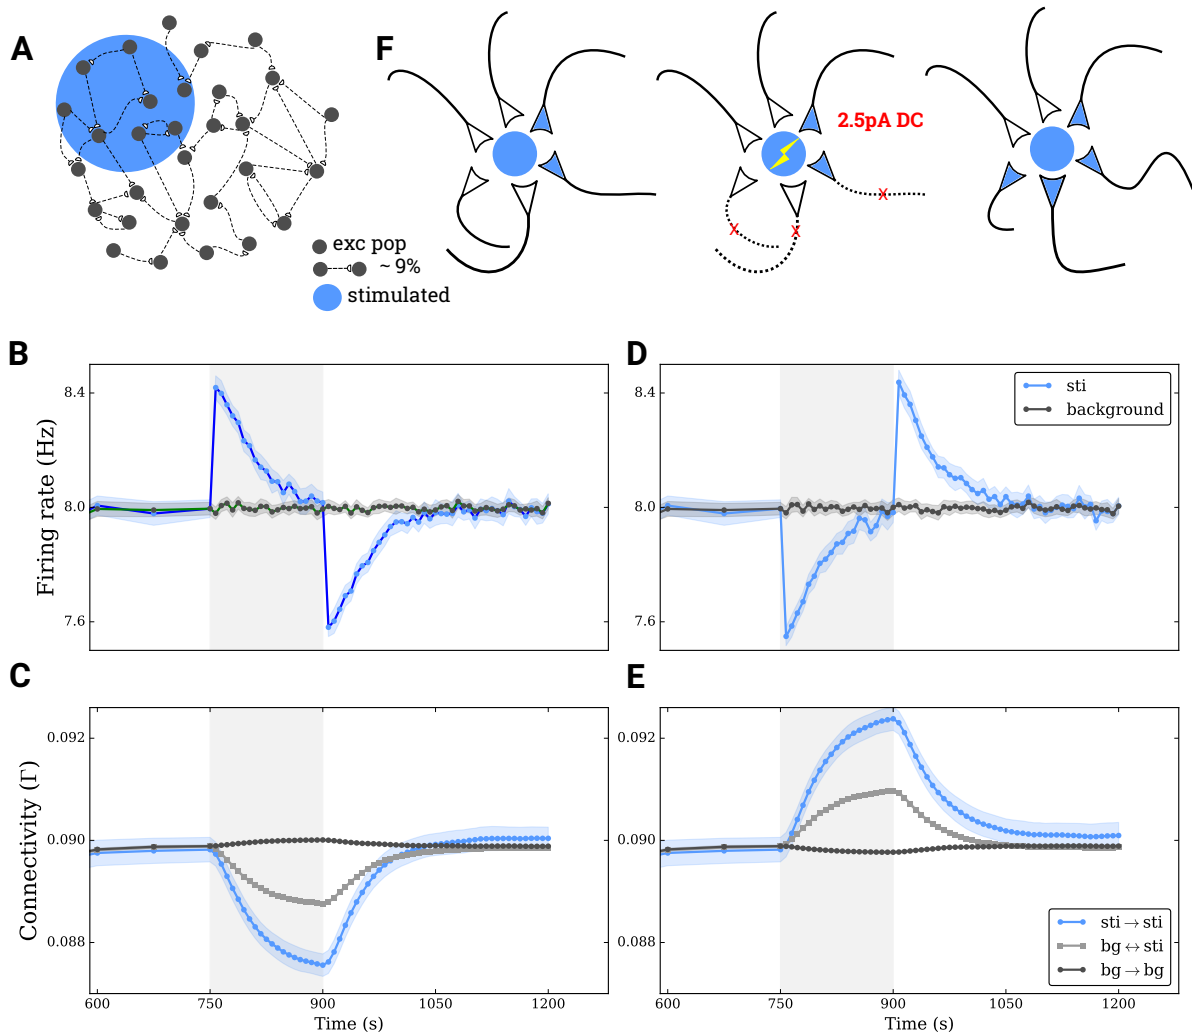

**Figure 2:** Effects of anodal (depolarizing) and cathodal (hyperpolarizing) tDCS in a recurrent network. **A** A subgroup comprising 10% of all excitatory neurons in a larger network is stimulated by tDCS. Excitatory neurons are more susceptible to stimulation due to their extended non-isotropic morphology, and in our model tDCS has no effect on inhibitory neurons. **B** Average firing rate of directly stimulated (blue) and non-stimulated (grey) excitatory neurons before, during and after stimulation. **C** Average connectivity among stimulated neurons (blue), among non-stimulated neurons (dark grey), and between neurons in different groups (light grey). When depolarizing current is applied, the resulting increase of the firing rate leads to a homeostatic response of the network in terms of a drop in connectivity. When the current is off, the resulting decrease of the firing rates triggers synaptic growth and cell assembly formation. **D, E** Similar to **B, C**, but for hyperpolarizing current injection. Note that both depolarization and hyperpolarization induced a small but persistent increase of the connectivity, corresponding to the formation of a cell assembly. **F** Before and after the stimulation, when an equilibrium is maintained with the same external input, the excitatory indegree of each neuron will be the same. A transient perturbation of the equilibrium by stimulation facilitates, with some delay, the deletion of synapses originating from non-stimulated neurons and the formation of new synapses from stimulated neurons. This leads to the formation of cell assemblies. Shaded areas on **B, C, D** and **E** indicate the stimulation period.



246 the relaxation phase. The final integral of G1 connectivity is plotted in Figure 4I. The  
247 values along the diagonal are very small, because there was neither synapse reorganization  
248 nor cell assembly formation in these conditions. The remaining integrals are symmetric  
249 along the diagonal. When the discrepancy between the two populations is large, close to  
250 the two corners for example, the integral of G1 connectivity is also large. We fixed the  
251 discrepancy between the pair of stimulation intensities and compare pairs:  $-30\text{pA}$  and  
252  $-10\text{pA}$ ,  $-20\text{pA}$  and  $0\text{pA}$ ,  $-10\text{pA}$  and  $10\text{pA}$ . As shown in the white square in Figure 4I,  
253 when the discrepancy is fixed to  $-20\text{pA}$ , the integral of  $-20\text{pA}$  and  $0\text{pA}$  situation is  
254 larger than both  $-30\text{pA}$  and  $-10\text{pA}$ , and  $-10\text{pA}$  and  $10\text{pA}$  case. The same tendency was  
255 observed in  $20\text{pA}$  discrepancy case. This supports the idea that network effects might  
256 influence the interaction between two groups, and that uni-group stimulation scenario  
257 achieves larger effects when stimulation is strong and focused.

## 258 **The effect of repeated transcranial DC stimulation**

259 To examine the effects of repetitive stimulation, we repeated the  $2.5\text{pA}$  DC stimulation  
260 in a  $10\%$  subpopulation with different stimulation time ( $t_1$ ) and relaxation interval ( $t_2$ )  
261 (Figure 5A). An example with  $t_1 = 150\text{s}$  and  $t_2 = 150\text{s}$  is shown in Figure 5B and 5C.  
262 Connectivity generally increases with repetition. Figure 5D summarizes different  $t_1$  and  
263  $t_2$  combinations. Compared to the basic condition,  $t_1 = 150\text{s}$ ,  $t_2 = 150\text{s}$ , an increase in  
264 relaxation time ( $t_2$ ) of  $300\text{s}$  led to higher connectivity than an increase in the stimulation  
265 time ( $t_1$ ) to  $300\text{s}$ . Therefore, we conclude that repetitive stimulation typically increases  
266 the effect of tDCS on cell assembly connectivity. But will it keep rising or saturate  
267 eventually? To answer this question, we should simulate the repetitive  $2.5\text{pA}$  tDCS  
268 for a long-enough time and check if connectivity eventually saturates. This, however,  
269 requires very long simulation times. In order to avoid these long simulations, we used  
270 the most effective combination ( $t_1 = 150\text{s}$  and  $t_2 = 300\text{s}$ ) and replaced the repetitive  
271 intensity with a stronger yet still sub-threshold DC intensity ( $30\text{pA}$ ) to achieve larger  
272 connectivity increment in each cycle and approximate the saturation level faster. After  
273 several repetitions of  $30\text{pA}$  stimulation, the connectivity seems to saturate at a relatively  
274 high level (Figure 5E). Different  $t_1$  and  $t_2$  combinations have slightly different saturation  
275 levels.

276 Since simple on-off repetitive stimulation could boost cell assembly formation, we won-  
277 dered if replacing the relaxation phase with an opposite current stimulation would further  
278 accelerate the process. We adopted two alternating stimulation patterns (Figure 6A) by  
279 applying step currents with alternating polarities ( $\pm 2.5\text{pA}$  or  $\pm 1.25\text{pA}$ ) to  $10\%$  excita-  
280 tory neurons with the same stimulation interval ( $t = 150\text{s}$ ). As Figure 6B and 6C shows,  
281 after three repetitions, alternative stimulation with  $\pm 2.5\text{pA}$  accelerated the connectivity  
282 when compared to on-off stimulation. However,  $\pm 1.25\text{pA}$  alternating stimulation results  
283 in same effects as the on-off stimulation. The cell assembly connectivity after 3 repetition  
284 cycles depends on the amplitude of the stimulation pulse, but not on whether it is an  
285 on-off or alternative protocol. Figure 6D summarizes the histogram (or the mean and  
286 standard deviation, plotted in the inset) of the final connectivity of 30 independent trails  
287 at the end of three repetitions, the  $\pm 2.5\text{pA}$  alternative repetition pattern achieves higher  
288 connectivity.

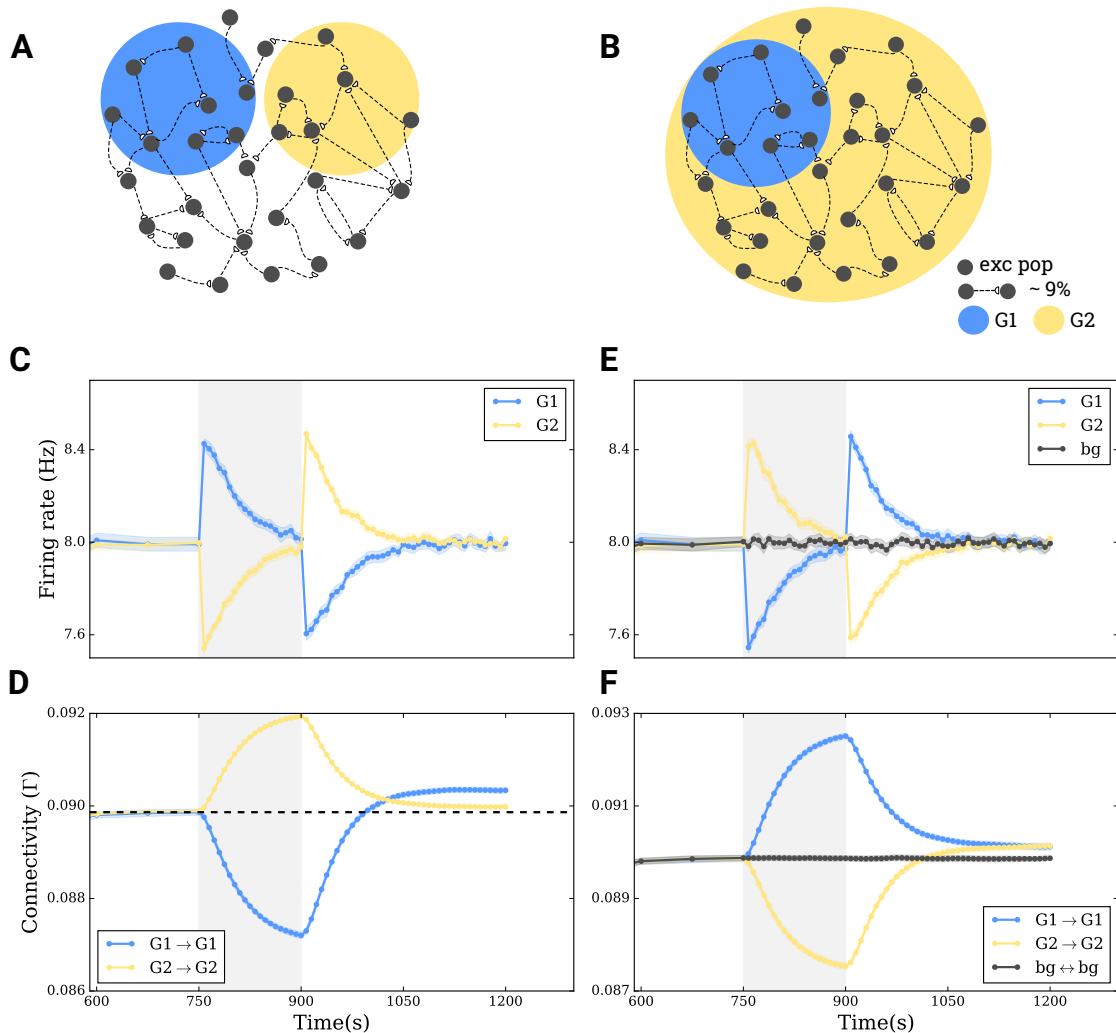

**Figure 3:** Simultaneous depolarizing and hyperpolarizing tDCS in a recurrent network. To understand the interaction between DC stimuli of different polarity, we apply depolarizing and hyperpolarizing currents to two different subgroups, respectively. Two scenarios are tested: **A** 30% of all neurons in a network (G1) are depolarized with 2.5 pA, another 30% (G2) are hyperpolarized with  $-2.5$  pA, and the rest of 40% receives no stimulus. **B** 30% (G1) are hyperpolarized with 2.5 pA, and the remaining 70% (G2) are depolarized with  $-2.5$  pA. **C, E** Group averages of firing rates in G1 (blue) and in G2 (yellow) before, during and after stimulation. **D, F** Group averages of the connectivity within G1 (blue), within G2 (yellow) and between G1 and G2 (grey). In both scenarios, cell assemblies were formed both within G1 and within G2.

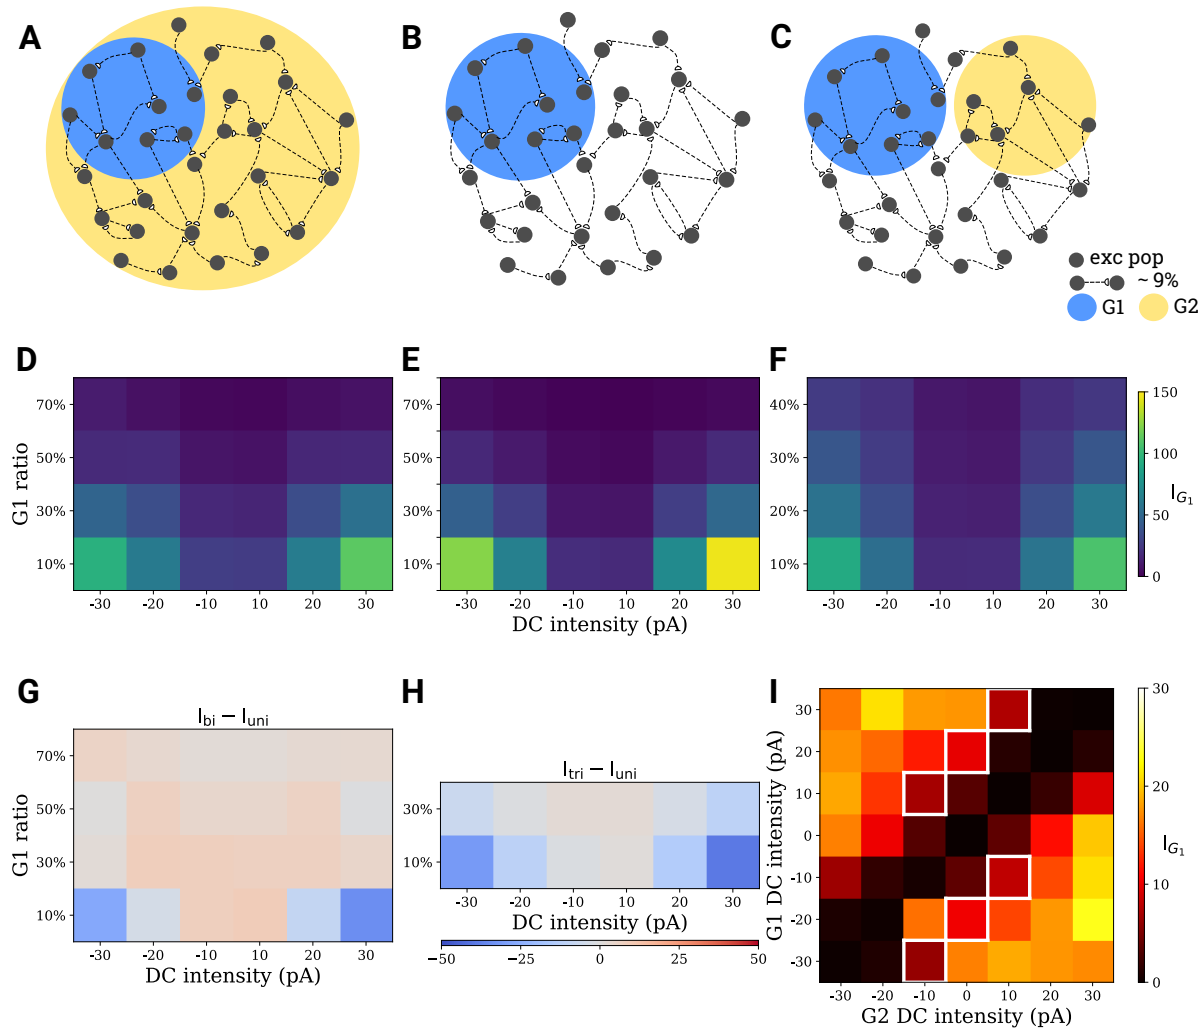

**Figure 4:** Comparison of tDCS effects in three different stimulation scenarios. **A** Bi-group stimulation: A subpopulation (G1) is stimulated with one polarity and all other excitatory neurons (G2) are stimulated with the opposite polarity. **B** Uni-group stimulation: A subpopulation (G1) is stimulated, and all remaining excitatory neurons receive no stimulus. **C** Tri-group stimulation: G1 and G2 have the same population size and are stimulated by opposite DC, while all other excitatory neurons receive no stimulus. **D** Effect of tDCS on cell assembly formation for scenario **A**, assuming different current amplitude and different relative sizes of the G1 population. The effects on cell assembly connectivity were measured as the integral ( $I_{G_1}$ ) of the fitted connectivity curve above baseline after turning the stimulus off (see text for details). **E**, **F** Similar to **D** for scenarios **B** and **C** respectively. In all simulations, the network was stimulated for 150 s and relaxed for 5850 s. Note that the stimulus polarity has almost no effect on the induced connectivity change. **G**, **H** Difference between **D** and **E**, as well as **F** and **E**, respectively. We found that the increased contrast provided by the opposite polarity generally boosted cell assembly connectivity. **I** We now made G1 and G2 equal in size and only changed the DC amplitude. We stimulated the network for 150 s and allowed it to relax for 5850 s. The effects were measured in the same way as for **D-F**. We found that the larger the discrepancy of stimulus strength is between two populations, the stronger the effect on the emerging connectivity is. The white squares indicate the same stimulus discrepancy between neuronal groups. The combination  $-20$  pA and  $0$  pA yielded stronger effects than  $-30$  pA and  $-10$  pA, or  $-10$  pA and  $+10$  pA.

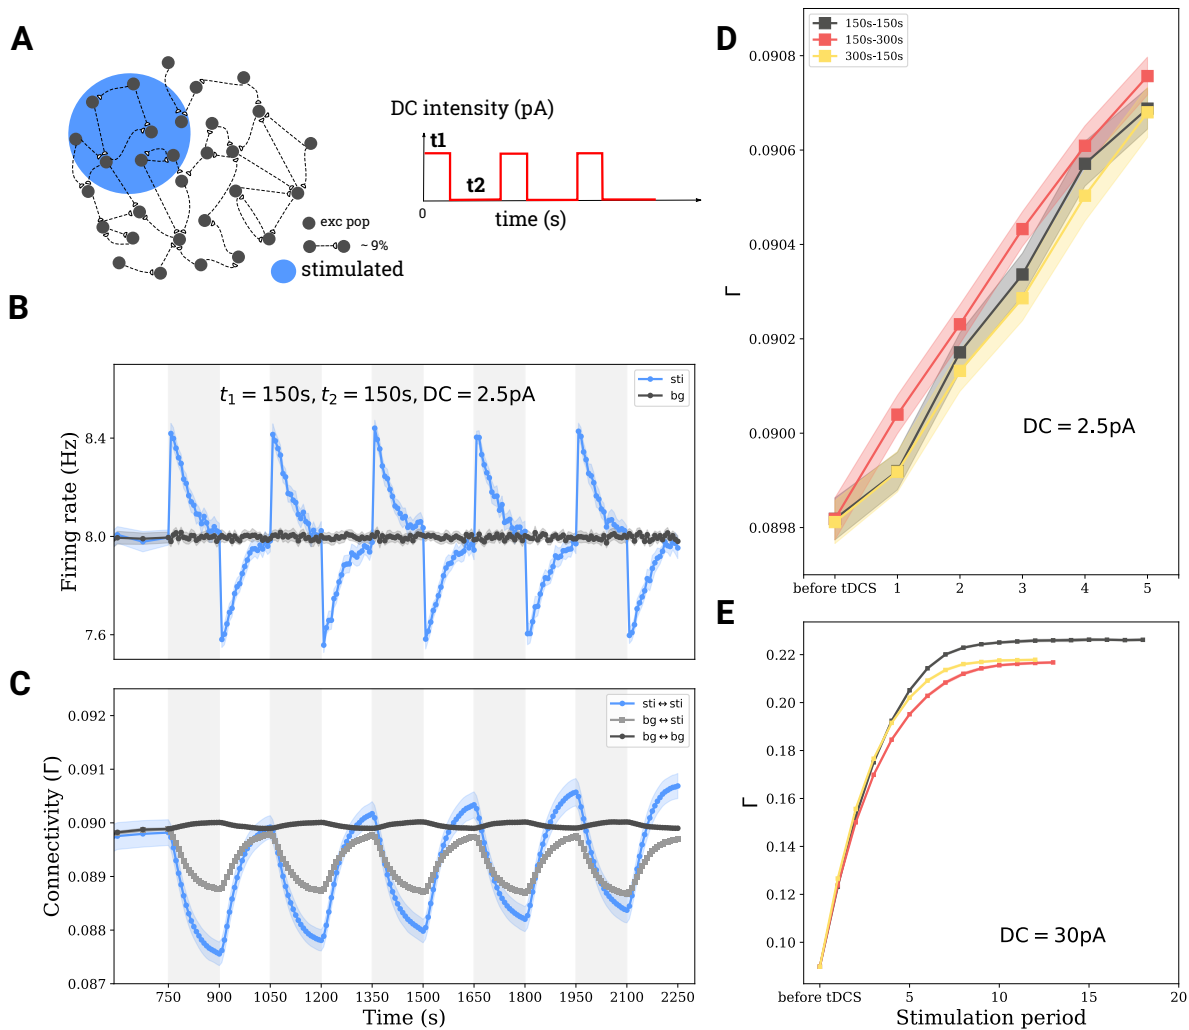

**Figure 5:** Repetitive stimulation boosts network remodeling. **A** The network is stimulated with a train of DC stimuli. Stimulation time is  $t_1$ , followed by a pause of duration  $t_2$ . **B** and **C** Average firing rate and connectivity during a train of stimuli. Repetitive stimulation of a subnetwork (10% of all excitatory neurons) with interspersed pauses boosts the connectivity of the cell assembly. **D** The effects depend on the stimulation time ( $t_1$ ) and the relaxation interval ( $t_2$ ). We tried different combinations of stimulation and relaxation times. The most efficient stimulation protocol is the shortest duty cycle that still allows the network to reach its structural equilibrium during and after the stimulation. **E** The connectivity increases linearly for the first few cycles and finally saturates at relatively high connectivity values. The DC amplitude was 30 pA for **E**, and 2.5 pA for all other subplots.

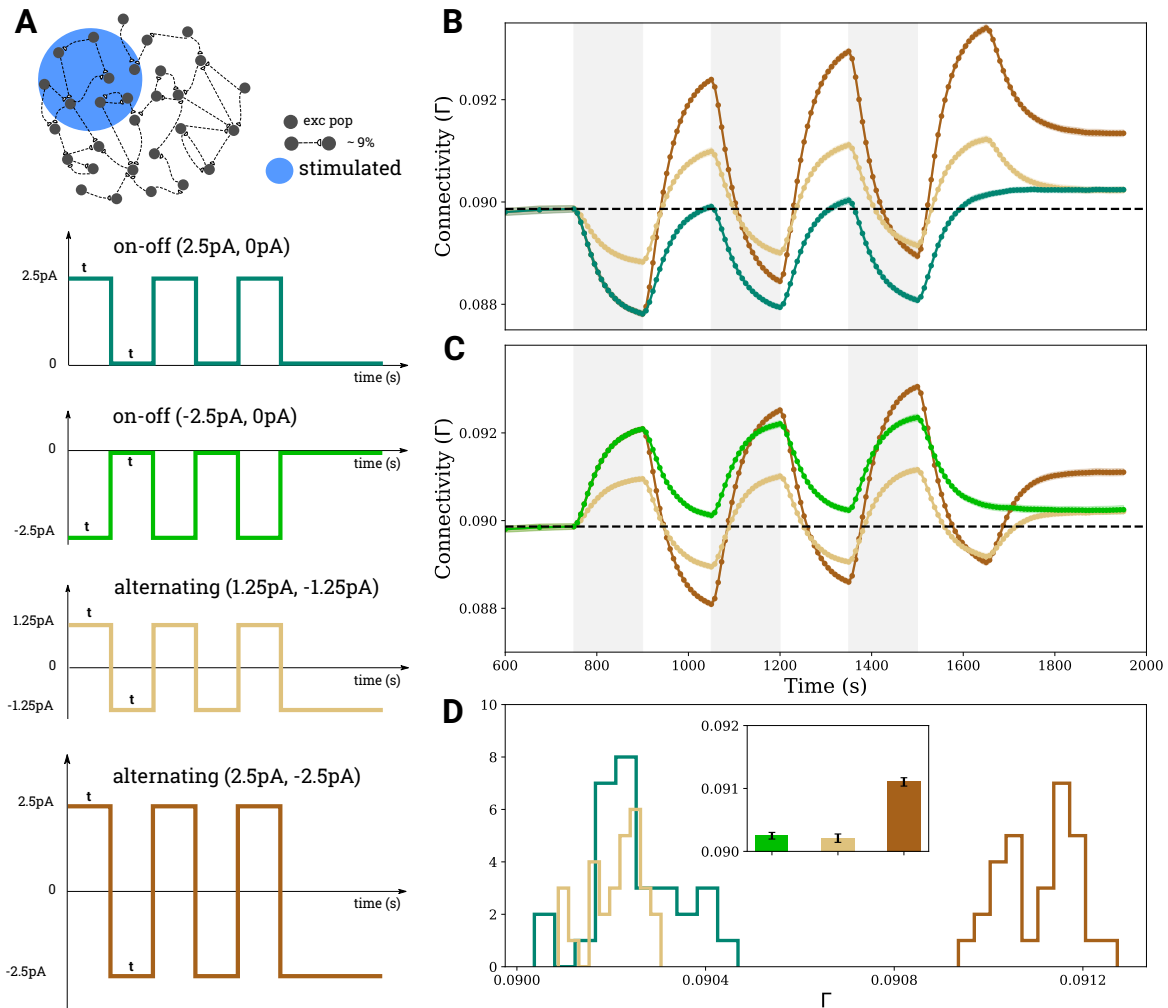

**Figure 6:** Comparison of four different scenarios for repetitive DC stimulation. **A** 10% of all neurons in the excitatory population were stimulated, using the same duty cycles in each case. However, different amplitudes and polarities were considered, as indicated by the four different curves. **B** and **C** Evolution of average connectivity for the different stimulation scenarios, colors match the stimulus curves in panel **A**. Alternating stimulation with  $\pm 2.5$  pA amplitudes (brown) lead to higher connectivity than the 2.5 pA on-off stimulation (light and dark green), while  $\pm 1.25$  pA alternating stimulation (orange) yielded roughly the same effects as an on-off stimulation with the same total amplitude (light and dark green). **D** Histograms of the connectivity reached after 3 cycles in the different scenarios extracted from 30 independent simulations. The inset shows mean and variance corresponding to the histograms.

## 289 Discussion

290 In the present study, we explored the plastic changes in network structure that could be  
291 induced by transcranial direct current stimulation (tDCS). We demonstrated that even  
292 relatively weak sub-threshold direct current stimulation can modulate the firing rate of a  
293 neuron that is part of an active network. This modulation can trigger network remodeling  
294 and cell assembly formation, if the network is subject to homeostatic structural plasticity.  
295 There is, in fact, strong evidence that activity-dependent network remodeling takes place  
296 in brains of all ages. We explored different parameters of tDCS stimulation with the help  
297 of our model and found that focused strong stimulation could enhance the newly formed  
298 cell assemblies. We also found that repetitive stimulation with well-chosen duty cycles  
299 could boost the induced structural changes, and repetitive stimulation with alternating  
300 sign may achieve even higher connectivity.

301 In our current study, we used connectivity as a direct readout of stimulation effects.  
302 Although there are currently no empirical data that directly demonstrate that structural  
303 changes arise as a consequence of stimulation, the factors that we found amplify its effects  
304 are not unheard of in tDCS practice. Strong focused stimulation, for example, which cor-  
305 responds to a high-definition electrode montage, does indeed lead to a stronger MEP and  
306 potentiates the therapeutic effects as compared to the conventional montage (Kuo et al.,  
307 2013). Applying the same total current, the high-definition montage induces stronger  
308 electric fields in smaller brain volumes as compared to the conventional montage (Ed-  
309 wards et al., 2013). As predicted by our model, a stronger electric field will polarize the  
310 membrane potential more, induce stronger firing rate responses and, therefore, lead to  
311 higher connectivity in the stimulated region. Moreover, a high-definition montage nar-  
312 rows down the affected brain region, and in our model this also contributes to higher  
313 connectivity. Repetitive stimulation, another factor predicted to boost connectivity, is  
314 already widely used in tDCS practice. As already mentioned in the Introduction, Monte-  
315 Silva et al. (2013) demonstrated that an interrupted 13 min - 20 min - 13 min stimulation  
316 yielded higher MEP after-effects than a single uninterrupted 26 min stimulation, while a  
317 repetition with a very long pause between stimulation episodes (13 min - 24 h - 13 min)  
318 did not accumulate the after-effects at all. The inter-stimulation interval and duty cycle  
319 does matter. In our model, the effective interval should be long enough for the system to  
320 recover its equilibrium firing rate and homeostatically respond by changing the connectiv-  
321 ity, but not too long for the connectivity to decay to the unperturbed level again. In our  
322 simulations, we found a 1 : 2 ratio for the ON-OFF period length to be highly efficient,  
323 very similar to what Monte-Silva et al. (2013) reported.

324 Other computational approaches have previously been suggested to analyze the tDCS  
325 mechanism. In experiments performed both in brain slices and human subjects, the mech-  
326 anistic understanding approached the level how tDCS/DCS could influence the electric  
327 activity of the brain at the single neuron level. Most notably, Bikson et al. (2006) has  
328 explored several very different aspects that may also contribute to tDCS function: potas-  
329 sium concentration, inhibitory neurons, action potential timing, and polarization of the  
330 axonal terminal. Most experimental and theoretical studies nowadays emphasize the role  
331 of excitatory neurons. Joucla and Yvert (2009) came up with the mirror estimation of  
332 membrane potential changes for large axons in the electric field, and Aspart et al. (2016)  
333 conceived the influence of the electric field on neuronal dendrites as external input to  
334 the soma. Another computational approach based on modern structural brain imaging

335 methods maps the current distribution onto the whole brain and provides answers to the  
336 question how strong the stimulation effects actually are. Spherical head models were first  
337 used to estimate the 3D current flow for any given electrode montage (Miranda et al.,  
338 2006). Then fMRI based individualized modeling was employed for treating stroke and  
339 depressive patients (Datta et al., 2009; Ho et al., 2014; Huang et al., 2017). Our current  
340 work also adopted the parameters from both experiments and estimations made by such  
341 approaches. We provide a new and original computational model to explore the plasticity  
342 at the network level, which bridges two approaches, from the level of single neurons to  
343 networks.

344 We should interpret the results and predictions of our work on network remodeling  
345 induced by tDCS with due caution. Although we know that homeostatic structural plas-  
346 ticity is extremely robust for a wide range of time scales (Gallinaro and Rotter, 2018), an  
347 exact match of the plasticity dynamics has not been attempted here. Also, considering  
348 only one type of plasticity is very likely a great simplification as compared to real brain  
349 networks. As shown by Monte-Silva et al. (2013) in experiments, different repetitive stim-  
350 ulation patterns triggered either early-LTP or late-LTP like phenomena; the non-linearity  
351 of intensity dependent after-effects reported by Jamil et al. (2017) also suggested a more  
352 complicated interaction. Our structural plasticity rule may fit the time scale of late-LTP,  
353 but not of early-LTP. The latter often sets in right after the anodal tDCS was turned off  
354 and lasts for at least two hours post stimulation, suggesting that Hebbian plasticity on  
355 a fast time scale is also involved. Therefore, a closer look at the interplay between fast  
356 functional plasticity and slow structural plasticity will be necessary to fully understand  
357 the inner logic of stimulation after-effects. On the other hand, there are still important  
358 factors that are not at all addressed by our computational approach yet. Astrocytes, for  
359 instance, were reported to be involved in the  $\text{Ca}^{2+}$  signaling and synaptic plasticity during  
360 tDCS (Monai and Hirase, 2017), but this is not yet reflected in our model. Moreover, the  
361 link between cell assembly connectivity, enhanced function and changed behavior (e.g.  
362 improved cognition and/or ameliorated depressive symptoms) is far from clear. Our cur-  
363 rent work, however, could be a first step toward the goal of devising optimized tDCS  
364 protocols.

## 365 Methods

### 366 Neuron model

367 All large-scale simulations of plastic neuronal networks of this study were performed with  
368 the NEST simulator (Bos et al., 2015). The current-based leaky integrate-and-fire neuron  
369 model was used throughout. This model is described by

$$\tau_m \frac{dV_i}{dt} = -V_i + \tau_m \sum_j J_{ij} S_j(t-d) + I_i^{\text{ext}} \quad (1)$$

370 where  $\tau_m$  is the membrane time constant. The variable  $V_i(t)$  is the membrane potential  
371 of neuron  $i$ , the resting value of which is set to 0 mV.  $I_i^{\text{ext}}$  comprises external inputs. The  
372 spike train generated by neuron  $i$  is denoted by  $S_i(t) = \sum_k \delta(t - t_i^k)$ , where  $t_i^k$  represent  
373 the individual spike times. The entries of the matrix  $J_{ij}$  denote the amplitude of the  
374 postsynaptic potential that is induced in neuron  $i$  upon the arrival of a spike from neuron

375 *j*. In our model, excitatory synapses have the amplitude  $J_E = 0.1$  mV, whereas inhibitory  
376 synapses have an amplitude of  $J_I = -0.8$  mV. When the membrane potential reaches the  
377 firing threshold,  $V_{th}$ , an action potential is generated and the membrane potential is reset  
378 to  $V_{reset} = 10$  mV. All parameters are again listed in Table 1.

## 379 Network model

380 The network underneath the stimulation electrode is conceived as an inhibition-dominated  
381 recurrent network (Brunel, 2000), comprising 10 000 excitatory and 2 500 inhibitory neu-  
382 rons. All E-I, I-E, I-I connections are static and synapses have a fixed synaptic weight  $J_E$   
383 or  $J_I$ , respectively. All these connections are randomly established, with 10% connection  
384 probability. In contrast, E-E connections are subject to a growth rule called homeostatic  
385 structural plasticity (Gallinaro and Rotter, 2018; Butz and van Ooyen, 2013; Diaz-Pier  
386 et al., 2016). The network has initially no E-E connections, they are grown according to  
387 the specified rule. Each neuron in the network receives Poisson external input at a rate  
388 of  $r_{ext} = 30$  kHz. For the parameters chosen here, the network enters an asynchronous-  
389 irregular state (Brunel, 2000). All network parameters are again listed in Table 2.

## 390 Homeostatic structural plasticity

391 As pointed out before, E-I, I-E, I-I connections have static synapses with  $J_E = 0.1$  mV  
392 for excitatory synapses and  $J_I = -0.8$  mV for inhibitory synapses. E-E connections  
393 undergo continuous remodeling, governed by a firing rate based homeostatic structural  
394 plasticity rule. Excitatory synapses are formed by combining a pre-synaptic bouton and  
395 a post-synaptic spine, the so-called synaptic elements. New synapses can form only if  
396 free synaptic elements are available. Pairs of neurons can form multiple synapses be-  
397 tween them, where each individual synapse has the same weight of  $J_E = 0.1$  mV. It has  
398 been observed in experiments that neurite growth is governed by the concentration of  
399 intracellular calcium. A specific hypothesis states that there is a set-point of the calcium  
400 concentration, which the neuron strives to reach (Ramakers et al., 2001; Mattson and  
401 Kater, 1987). In the model of structural plasticity we use in our work, the growth and  
402 deletion of synaptic elements is linked to the time-dependent intracellular calcium concen-  
403 tration  $C(t) = [Ca^{2+}]$  of the neuron in question. In fact, this variable is a good indicator  
404 of the neuron's firing rate (Grewe et al., 2010): Whenever the neuron generates a spike  
405 as represented by the spike train  $S(t)$ , the intracellular calcium concentration experiences  
406 an increase by the amount  $\beta_{Ca}$  through calcium influx. In between two steps, the calcium  
407 concentration decays exponentially with time constant  $\tau_{Ca}$

$$\frac{dC(t)}{dt} = -\frac{1}{\tau_{Ca}}C(t) + \beta_{Ca}S(t). \quad (2)$$

408 The synaptic growth rule is now as follows: When the firing rate (or calcium concen-  
409 tration) is below its set-point, the neuron will grow new synaptic elements to compensate  
410 for the lack of input. Existing synapses are broken up and synaptic elements are added to  
411 the pool of free synaptic elements, if the firing rate is above the set-point. We adopted a  
412 liner growth rule for both presynaptic and postsynaptic elements (Gallinaro and Rotter,



413 2018)

$$\frac{dz}{dt} = \nu \left[ 1 - \frac{1}{\epsilon} C(t) \right], \quad (3)$$

414 where  $z$  is the number of (presynaptic or postsynaptic) elements,  $\nu$  is the growth rate, and  
415  $\epsilon$  is the target level of calcium concentration, measured in arbitrary units. In any given  
416 moment, free synaptic elements are randomly combined into new functional synapses. All  
417 the parameters defining the structural plasticity rule are listed in Table 3.

## 418 Measurements and calculations

### 419 Firing rate.

420 The firing rate of a neuron is calculated as its time-averaged spike count, based on 5 s  
421 activity recording. The mean firing rate in a population is the arithmetic mean of firing  
422 rates across neurons in the group.

### 423 Synaptic connectivity.

424 The connectivity,  $\Gamma$ , is calculated as the mean number of synapses per pair of neurons in  
425 a certain group. Let  $(A_{ij})$  be the  $n \times n$  connectivity matrix of a network with  $n$  neurons.  
426 Its columns correspond to the axons, its rows correspond to the dendrites of the neurons  
427 involved. The specific entry  $A_{ij}$  of this matrix represents the total number of synapses  
428 from the presynaptic neuron  $j$  to the postsynaptic neuron  $i$ . The mean connectivity of  
429 this network is then given by  $\Gamma = \frac{1}{n^2} \sum_{ij} A_{ij}$ .

### 430 Time integral of the connectivity.

431 When comparing the effects of different stimulation scenarios, one cannot simply compare  
432 the connectivity of the cell assembly at the end of simulation, because the connectivity  
433 decays with different time constants. Therefore, we fit the connectivity change over time  
434 during the relaxation phase by a sum of three exponential decay functions

$$\Gamma(t) = A_1 \exp^{-t/\tau_1} + A_2 \exp^{-t/\tau_2} + A_3 \exp^{-t/\tau_3}. \quad (4)$$

435 The parameter  $A_k$  is the amplitude of a component that decays with time constant  $\tau_k$ .  
436 We calculated the total integral of the connectivity by extrapolation  $I_G = \sum_k A_k \tau_k$ . This  
437 way we can also account for connectivity transients that persist for a very long time,  
438 beyond the duration of our simulations.

### 439 Stimulation parameters.

440 In our study we tested different DC stimulation scenarios. All stimulation parameters are  
441 summarized in Table 4.

**Table 1:** Parameters of neuron model

| $\tau_m$ | $t_{\text{ref}}$ | $V_0$  | $V_{\text{reset}}$ | $V_{\text{th}}$ |
|----------|------------------|--------|--------------------|-----------------|
| 10.0 ms  | 2.0 ms           | 0.0 mV | 10.0 mV            | 20.0 mV         |

**Table 2:** Parameters of network model

| $N_E$  | $N_I$ | $\Gamma_{E-I}$ | $\Gamma_{I-E}$ | $\Gamma_{I-I}$ | $J_E$  | $J_I$   | $r_{\text{ext}}$ |
|--------|-------|----------------|----------------|----------------|--------|---------|------------------|
| 10 000 | 2 500 | 10%            | 10%            | 10%            | 0.1 mV | -0.8 mV | 30 kHz           |

**Table 3:** Parameters of the structural plasticity model

| $\epsilon$ | $\nu$                  | $\tau_{\text{Ca}}$ | $\beta_{\text{Ca}}$ |
|------------|------------------------|--------------------|---------------------|
| 0.008      | $0.004 \text{ s}^{-1}$ | 10 s               | 0.0001              |

## 442 Supportive Information

### 443 Authorcontributions

444 The project was planned and realized by HL, JG, SR. JG established the network model  
445 with homeostatic structural plasticity. HL formalized the model of tDCS and performed  
446 all numerical simulations. HL analyzed the data; JR and SR contributed to the data  
447 analysis. HL wrote the manuscript, and all authors contributed to the revision.

### 448 Acknowledgments

449 This work is funded by the Universitätsklinikum Freiburg and NEUREX. Additional  
450 support by the German Research Foundation (DFG) through EXC 1086, and by the state  
451 of Baden-Württemberg through bwHPC and the German Research Foundation (DFG)  
452 through INST 39/963-1 FUGG is acknowledged. The authors thank Claus Normann,  
453 Lukas Frase, Andre Russowsky Brunoni, and Benjamin Merkt for useful discussions. We  
454 also thank Uwe Grauer from the Bernstein Center Freiburg as well as Bernd Wiebelt and  
455 Michael Janczyk from the Freiburg University Computing Center for their assistance with  
456 HPC applications.

**Table 4:** Configurations of DC stimulation

| protocol             | $f_{G1}$              | $I_{G1}$ [pA]        | $f_{G2}$     | $I_{G2}$ [pA] | $f_{G3}$                | $I_{G3}$ [pA] | growth [s] | repetition | stimulation           | relaxation [s] |
|----------------------|-----------------------|----------------------|--------------|---------------|-------------------------|---------------|------------|------------|-----------------------|----------------|
| Figure 2B            | 10%                   | 2.5                  | 90%          | 0             | -                       | -             | 750        | no         | 150                   | 300            |
| Figure 2D            | 10%                   | 2.5                  | 90%          | 0             | -                       | -             | 750        | no         | 150                   | 300            |
| Figure 3A            | 30%                   | 2.5                  | 30%          | -2.5          | 40%                     | 0             | 750        | no         | 150                   | 300            |
| Figure 3B            | 30%                   | 2.5                  | 70%          | -2.5          | -                       | -             | 750        | no         | 150                   | 300            |
| Figure 4A            | 10%, 70% <sup>1</sup> | -30, 30 <sup>2</sup> | 1 - $f_{G1}$ | - $I_{G1}$    | -                       | -             | 750        | no         | 150                   | 5850           |
| Figure 4B            | 10%, 70%              | -30, 30              | 1 - $f_{G1}$ | 0             | -                       | -             | 750        | no         | 150                   | 5850           |
| Figure 4C            | 10%, 40% <sup>3</sup> | -30, 30              | $f_{G1}$     | - $I_{G1}$    | 1 - $f_{G1}$ - $f_{G2}$ | 0             | 750        | no         | 150                   | 5850           |
| Figure 4I            | 50%                   | -30, 30              | 50%          | - $I_{G1}$    | -                       | -             | 750        | no         | 150                   | 5850           |
| Figure 5             | 10%                   | 2.5, 30              | 90%          | 0             | -                       | -             | 750        | yes        | multiple <sup>4</sup> |                |
| Figure 6-on-off      | 10%                   | 2.5                  | 90%          | 0             | -                       | -             | 750        | yes        | 150                   | 150            |
| Figure 6-on-off      | 10%                   | -2.5                 | 90%          | 0             | -                       | -             | 750        | yes        | 150                   | 150            |
| Figure 6-alternating | 10%                   | $\pm 1.25$           | 90%          | 0             | -                       | -             | 750        | yes        | 150                   | 150            |
| Figure 6-alternating | 10%                   | $\pm 2.5$            | 90%          | 0             | -                       | -             | 750        | yes        | 150                   | 150            |

<sup>1</sup> The stimulation ratios are 10%, 30%, 50%, 70%

<sup>2</sup> The stimulation intensities are -30, -20, -10, 10, 20, 30 pA

<sup>3</sup> The stimulation ratios are 10%, 20%, 30%, 40%

<sup>4</sup> The combinations used are (150, 150), (150, 300), (300, 150) s.

All results in this study except Figure 4I are averages from 30 independent simulations.

## References

- 457
- 458 Aspart, F., Ladenbauer, J., and Obermayer, K. (2016). Extending integrate-and-fire  
459 model neurons to account for the effects of weak electric fields and input filtering me-  
460 diated by the dendrite. *PLoS computational biology*, 12(11):e1005206.
- 461 Bikson, M., Inoue, M., Akiyama, H., Deans, J. K., Fox, J. E., Miyakawa, H., and Jefferys,  
462 J. G. (2004). Effects of uniform extracellular dc electric fields on excitability in rat  
463 hippocampal slices in vitro. *The Journal of physiology*, 557(1):175–190.
- 464 Bikson, M., Radman, T., and Datta, A. (2006). Rational modulation of neuronal process-  
465 ing with applied electric fields. In *Engineering in Medicine and Biology Society, 2006.*  
466 *EMBS'06. 28th Annual International Conference of the IEEE*, pages 1616–1619. IEEE.
- 467 Bos, H., Morrison, A., Peyser, A., Hahne, J., Helias, M., Kunkel, S., Ippen, T., Eppler,  
468 J. M., Schmidt, M., Seeholzer, A., and et al. (2015). Nest 2.10.0.
- 469 Brunel, N. (2000). Dynamics of sparsely connected networks of excitatory and inhibitory  
470 spiking neurons. *Journal of computational neuroscience*, 8(3):183–208.
- 471 Butz, M. and van Ooyen, A. (2013). A simple rule for dendritic spine and axonal bou-  
472 ton formation can account for cortical reorganization after focal retinal lesions. *PLoS*  
473 *computational biology*, 9(10):e1003259.
- 474 DaSilva, A. F., Volz, M. S., Bikson, M., and Fregni, F. (2011). Electrode positioning and  
475 montage in transcranial direct current stimulation. *J Vis Exp*, (51).
- 476 Datta, A., Bansal, V., Diaz, J., Patel, J., Reato, D., and Bikson, M. (2009). Gyri-  
477 precise head model of transcranial direct current stimulation: improved spatial focality  
478 using a ring electrode versus conventional rectangular pad. *Brain Stimulation: Basic,*  
479 *Translational, and Clinical Research in Neuromodulation*, 2(4):201–207.
- 480 Diaz-Pier, S., Naveau, M., Ostendorf, M., and Morrison, A. (2016). Automatic generation  
481 of connectivity for large-scale neuronal network models through structural plasticity.  
482 *Frontiers in neuroanatomy*, 10:57.
- 483 Edwards, D., Cortes, M., Datta, A., Minhas, P., Wassermann, E. M., and Bikson, M.  
484 (2013). Physiological and modeling evidence for focal transcranial electrical brain stim-  
485 ulation in humans: a basis for high-definition tdc. *Neuroimage*, 74:266–275.
- 486 Fritsch, B., Reis, J., Martinowich, K., Schambra, H. M., Ji, Y., Cohen, L. G., and Lu,  
487 B. (2010). Direct current stimulation promotes bdnf-dependent synaptic plasticity:  
488 potential implications for motor learning. *Neuron*, 66(2):198–204.
- 489 Gallinaro, J. V. and Rotter, S. (2018). Associative properties of structural plasticity based  
490 on firing rate homeostasis in recurrent neuronal networks. *Scientific reports*, 8(1):3754.
- 491 Garcia-Larrea, L. (2016). tdc. as a procedure for chronic pain relief. *Neurophysiologie*  
492 *Clinique/Clinical Neurophysiology*, 46(3):224.

- 493 Gartside, I. B. (1968a). Mechanisms of sustained increases of firing rate of neurones in the  
494 rat cerebral cortex after polarization: reverberating circuits or modification of synaptic  
495 conductance? *Nature*, 220(5165):382.
- 496 Gartside, I. B. (1968b). Mechanisms of sustained increases of firing rate of neurones in the  
497 rat cerebral cortex after polarization: role of protein synthesis. *Nature*, 220(5165):383.
- 498 Gluckman, B. J., Neel, E. J., Netoff, T. I., Ditto, W. L., Spano, M. L., and Schiff, S. J.  
499 (1996). Electric field suppression of epileptiform activity in hippocampal slices. *Journal*  
500 *of Neurophysiology*, 76(6):4202–4205.
- 501 Grewe, B. F., Langer, D., Kasper, H., Kampa, B. M., and Helmchen, F. (2010). High-  
502 speed in vivo calcium imaging reveals neuronal network activity with near-millisecond  
503 precision. *Nature methods*, 7(5):399.
- 504 Ho, K.-A., Bai, S., Martin, D., Alonzo, A., Dokos, S., Puras, P., and Loo, C. K. (2014).  
505 A pilot study of alternative transcranial direct current stimulation electrode montages  
506 for the treatment of major depression. *Journal of affective disorders*, 167:251–258.
- 507 Huang, Y., Liu, A. A., Lafon, B., Friedman, D., Dayan, M., Wang, X., Bikson, M.,  
508 Doyle, W. K., Devinsky, O., and Parra, L. C. (2017). Measurements and models of  
509 electric fields in the in vivo human brain during transcranial electric stimulation. *Elife*,  
510 6:e18834.
- 511 Jackson, M. P., Rahman, A., Lafon, B., Kronberg, G., Ling, D., Parra, L. C., and Bikson,  
512 M. (2016). Animal models of transcranial direct current stimulation: methods and  
513 mechanisms. *Clinical Neurophysiology*, 127(11):3425–3454.
- 514 Jamil, A., Batsikadze, G., Kuo, H.-I., Labruna, L., Hasan, A., Paulus, W., and Nitsche,  
515 M. A. (2017). Systematic evaluation of the impact of stimulation intensity on neuro-  
516 plastic after-effects induced by transcranial direct current stimulation. *The Journal of*  
517 *physiology*, 595(4):1273–1288.
- 518 Joucla, S. and Yvert, B. (2009). The “mirror” estimate: an intuitive predictor of mem-  
519 brane polarization during extracellular stimulation. *Biophysical journal*, 96(9):3495–  
520 3508.
- 521 Kayyali, H. and Durand, D. (1991). Effects of applied currents on epileptiform bursts in  
522 vitro. *Experimental neurology*, 113(2):249–254.
- 523 Kuo, H.-I., Bikson, M., Datta, A., Minhas, P., Paulus, W., Kuo, M.-F., and Nitsche, M. A.  
524 (2013). Comparing cortical plasticity induced by conventional and high-definition 4×  
525 1 ring tdc: a neurophysiological study. *Brain Stimulation: Basic, Translational, and*  
526 *Clinical Research in Neuromodulation*, 6(4):644–648.
- 527 Lang, N., Siebner, H. R., Ward, N. S., Lee, L., Nitsche, M. A., Paulus, W., Rothwell, J. C.,  
528 Lemon, R. N., and Frackowiak, R. S. (2005). How does transcranial dc stimulation of  
529 the primary motor cortex alter regional neuronal activity in the human brain? *European*  
530 *Journal of Neuroscience*, 22(2):495–504.

- 531 Lee, K. J., Queenan, B. N., Rozeboom, A. M., Bellmore, R., Lim, S. T., Vicini, S., and  
532 Pak, D. T. (2013). Mossy fiber-ca3 synapses mediate homeostatic plasticity in mature  
533 hippocampal neurons. *Neuron*, 77(1):99–114.
- 534 Loo, C. K., Alonzo, A., Martin, D., Mitchell, P. B., Galvez, V., and Sachdev, P. (2012).  
535 Transcranial direct current stimulation for depression: 3-week, randomised, sham-  
536 controlled trial. *The British Journal of Psychiatry*, 200(1):52–59.
- 537 Matsunaga, K., Nitsche, M. A., Tsuji, S., and Rothwell, J. C. (2004). Effect of transcranial  
538 dc sensorimotor cortex stimulation on somatosensory evoked potentials in humans.  
539 *Clinical Neurophysiology*, 115(2):456–460.
- 540 Mattson, M. P. and Kater, S. B. (1987). Calcium regulation of neurite elongation and  
541 growth cone motility. *Journal of Neuroscience*, 7(12):4034–4043.
- 542 Miranda, P. C., Lomarev, M., and Hallett, M. (2006). Modeling the current distribution  
543 during transcranial direct current stimulation. *Clinical neurophysiology*, 117(7):1623–  
544 1629.
- 545 Monai, H. and Hirase, H. (2017). Astrocytes as a target of transcranial direct current  
546 stimulation (tdcs) to treat depression. *Neuroscience research*.
- 547 Monte-Silva, K., Kuo, M.-F., Hessenthaler, S., Fresnoza, S., Liebetanz, D., Paulus, W.,  
548 and Nitsche, M. A. (2013). Induction of late ltp-like plasticity in the human motor cortex  
549 by repeated non-invasive brain stimulation. *Brain Stimulation: Basic, Translational,  
550 and Clinical Research in Neuromodulation*, 6(3):424–432.
- 551 Ngernyam, N., Jensen, M. P., Arayawichanon, P., Auvichayapat, N., Tiamkao, S., Jan-  
552 jarasjitt, S., Punjaruk, W., Amatachaya, A., Aree-uea, B., and Auvichayapat, P. (2015).  
553 The effects of transcranial direct current stimulation in patients with neuropathic pain  
554 from spinal cord injury. *Clinical Neurophysiology*, 126(2):382–390.
- 555 Nitsche, M. A., Boggio, P. S., Fregni, F., and Pascual-Leone, A. (2009). Treatment of  
556 depression with transcranial direct current stimulation (tdcs): a review. *Experimental  
557 neurology*, 219(1):14–19.
- 558 Nitsche, M. A., Fricke, K., Henschke, U., Schlitterlau, A., Liebetanz, D., Lang, N., Hen-  
559 ning, S., Tergau, F., and Paulus, W. (2003). Pharmacological modulation of cortical  
560 excitability shifts induced by transcranial direct current stimulation in humans. *J.  
561 Physiol. (Lond.)*, 553(Pt 1):293–301.
- 562 Nitsche, M. A. and Paulus, W. (2000). Excitability changes induced in the human motor  
563 cortex by weak transcranial direct current stimulation. *The Journal of physiology*,  
564 527(3):633–639.
- 565 Nitsche, M. A. and Paulus, W. (2001). Sustained excitability elevations induced by tran-  
566 scranial dc motor cortex stimulation in humans. *Neurology*, 57(10):1899–1901.
- 567 Oray, S., Majewska, A., and Sur, M. (2004). Dendritic spine dynamics are regulated by  
568 monocular deprivation and extracellular matrix degradation. *Neuron*, 44(6):1021–1030.

- 569 Radman, T., Ramos, R. L., Brumberg, J. C., and Bikson, M. (2009). Role of cortical  
570 cell type and morphology in subthreshold and suprathreshold uniform electric field  
571 stimulation in vitro. *Brain Stimulation: Basic, Translational, and Clinical Research in*  
572 *Neuromodulation*, 2(4):215–228.
- 573 Ramakers, G., Avci, B., Van Hulten, P., Van Ooyen, A., Van Pelt, J., Pool, C., and Lequin,  
574 M. (2001). The role of calcium signaling in early axonal and dendritic morphogenesis  
575 of rat cerebral cortex neurons under non-stimulated growth conditions. *Developmental*  
576 *Brain Research*, 126(2):163–172.
- 577 Ranieri, F., Podda, M. V., Riccardi, E., Frisullo, G., Dileone, M., Profice, P., Pilato, F.,  
578 Di Lazzaro, V., and Grassi, C. (2012). Modulation of ltp at rat hippocampal ca3-ca1  
579 synapses by direct current stimulation. *Journal of neurophysiology*, 107(7):1868–1880.
- 580 Trachtenberg, J. T., Chen, B. E., Knott, G. W., Feng, G., Sanes, J. R., Welker, E.,  
581 and Svoboda, K. (2002). Long-term in vivo imaging of experience-dependent synaptic  
582 plasticity in adult cortex. *Nature*, 420(6917):788.
- 583 Turrigiano, G. G. and Nelson, S. B. (2004). Homeostatic plasticity in the developing  
584 nervous system. *Nature Reviews Neuroscience*, 5(2):97.
- 585 Van Ooyen, A. (2011). Using theoretical models to analyse neural development. *Nature*  
586 *Reviews Neuroscience*, 12(6):311.
- 587 Wiethoff, S., Hamada, M., and Rothwell, J. C. (2014). Variability in response to transcranial  
588 direct current stimulation of the motor cortex. *Brain stimulation*, 7(3):468–475.
